# Supplementary material for: Nutrient-Derived Beneficial for Blood Pressure Dietary Pattern Associated with Hypertension Prevention and Control: Based on China Nutrition and Health Surveillance 2015–2017
Source: MDPI journal article supplement (doi:10.3390/nu14153108), 2022-07-28
Supplement: s1 [file s1]

**Table S1.** Characteristics of dietary patterns derived from RRR

| Dietary pattern                               | DP1    | DP2     | DP3     | DP4     | DP5     | DP6     | DP7     |
|-----------------------------------------------|--------|---------|---------|---------|---------|---------|---------|
| Explained variation of response variables (%) | 66.08  | 8.172   | 5.819   | 4.33    | 2.638   | 0.5     | 0.389   |
| Explained variation of food items (%)         | 5.725  | 3.879   | 4.35    | 2.21    | 3.686   | 3.39    | 3.441   |
| <b>Factor loading</b>                         |        |         |         |         |         |         |         |
| Refined grains                                | -0.314 | 0.177   | 0.187   | 0.366   |         | -0.167  |         |
| Coarse cereals                                | 0.136  | 0.281   | -0.364  | 0.23    | -0.242  | 0.15    |         |
| Legumes and related products                  | 0.145  | 0.148   | -0.129  | 0.133   | 0.15    | -0.114  | -0.276  |
| Nuts and seeds                                | 0.158  | 0.14    | -0.342  |         | -0.276  | 0.354   | 0.151   |
| Tubers                                        |        | 0.145   |         | 0.112   | -0.105  |         | -0.24   |
| Fried staples                                 |        |         | -0.106  |         |         |         |         |
| Fresh vegetables                              | 0.537  | 0.182   | 0.44    | -0.115  |         | -0.128  |         |
| Dried vegetables                              |        |         |         |         |         | -0.247  | 0.231   |
| Fermented vegetables                          |        |         |         |         | -0.157  | -0.11   | -0.231  |
| Mushrooms/edible fungi                        | 0.344  |         | -0.445  |         | 0.64    |         |         |
| Seaweeds                                      | 0.196  |         | -0.19   |         | 0.254   |         | 0.169   |
| Fresh fruits                                  | 0.37   | 0.164   | 0.127   | -0.473  | 0.175   | 0.305   |         |
| Dried fruits                                  | 0.173  |         | -0.254  |         |         | -0.166  | 0.407   |
| Dairy products                                | 0.31   | -0.766  |         | -0.117  | -0.222  |         | 0.105   |
| Pork                                          |        | -0.143  | 0.34    | 0.597   | 0.402   |         | 0.108   |
| Beef, lamb, and other meats                   |        | -0.157  |         |         | 0.1     | 0.375   | -0.317  |
| Poulties                                      |        | -0.141  |         | 0.116   | 0.159   | 0.253   | -0.166  |
| Processed meats                               |        |         |         |         |         |         |         |
| Organs                                        |        |         |         | 0.187   | 0.111   | 0.205   |         |
| Aquatic products                              | 0.142  | -0.172  |         | 0.224   |         | -0.13   | -0.371  |
| Fresh eggs                                    | 0.189  | -0.185  |         | 0.101   |         | 0.488   |         |
| Processed eggs                                |        |         |         |         |         | 0.106   |         |
| Western staples                               | 0.109  | -0.112  |         |         |         |         |         |
| Snacks                                        |        |         |         |         |         |         |         |
| 100% vegetable and fruit juice                |        |         |         | -0.112  |         |         | -0.232  |
| Coffee                                        |        |         |         |         |         | -0.181  | -0.39   |
| Sweetened beverages                           |        |         |         |         |         |         |         |
| Alcohol                                       | -0.106 |         |         |         |         | -0.132  | 0.118   |
| <b>Correlations with response nutrients</b>   |        |         |         |         |         |         |         |
| Thiamin                                       | 0.549* | 0.168 * | 0.353*  | 0.515*  | 0.042*  | -0.002  | 0.097*  |
| Riboflavin                                    | 0.863* | -0.193* | 0.046*  | 0.1*    | 0.084*  | 0.191*  | 0.019*  |
| Vitamin C                                     | 0.806* | 0.285*  | 0.414*  | -0.231* | -0.018* | 0.061*  | -0.008  |
| Calcium                                       | 0.916* | -0.038* | 0.038*  | -0.085* | -0.235* | -0.009* | -0.029* |
| Magnesium                                     | 0.830* | 0.402*  | -0.201* | 0.116*  | -0.365* | 0.129*  | -0.064* |
| Potassium                                     | 0.928* | 0.093*  | -0.011* | 0.035*  | -0.006  | 0.047*  | -0.109* |
| Dietary fiber                                 | 0.889* | 0.409*  | -0.136* | -0.065* | -0.104* | 0.101*  | 0.026*  |

\* Indicates *p* value <0.05.

**Table S2.** Daily food intakes of participants by quintiles of BBP-diet score

| Food item                       | Quintile                |                      |                      |                         |                      |
|---------------------------------|-------------------------|----------------------|----------------------|-------------------------|----------------------|
|                                 | Q1                      | Q2                   | Q3                   | Q4                      | Q5                   |
| Refined grains*                 | 304.93 (202.47, 456.99) | 303.29 (207.12, 450) | 300 (200, 400)       | 242.74 (156.99, 328.49) | 170.96 (112.74, 250) |
| Coarse grains*                  | 0 (0, 3.95)             | 0 (0, 9.86)          | 1.64 (0, 18.08)      | 4.27 (0, 27.85)         | 9.86 (0, 34.19)      |
| Legumes and related products*   | 14.36 (4.03, 40.34)     | 21.49 (7.59, 53.41)  | 28.49 (10.39, 65.05) | 37.07 (14.66, 80.74)    | 44.21 (18.99, 91.35) |
| Nuts and seeds*                 | 0 (0, 2.63)             | 0.55 (0, 6.58)       | 1.1 (0, 8.55)        | 1.64 (0, 14.25)         | 2.85 (0, 14.25)      |
| Tubers*                         | 7.12 (0.41, 28.49)      | 13.15 (1.64, 42.74)  | 14.25 (3.29, 50)     | 21.37 (4.93, 56.99)     | 25.64 (7.12, 60)     |
| Fried staples*                  | 0 (0, 3.45)             | 0 (0, 6.58)          | 0 (0, 7.56)          | 0.41 (0, 8.55)          | 0 (0, 6.9)           |
| Fresh vegetables*               | 100 (50, 200)           | 200 (100, 300)       | 284.93 (160, 400)    | 300 (200, 500)          | 400 (250, 600)       |
| Dried vegetables*               | 0 (0, 0)                | 0 (0, 0.05)          | 0 (0, 0.11)          | 0 (0, 0.14)             | 0 (0, 0.16)          |
| Fermented vegetables*           | 0.66 (0, 7.89)          | 0.82 (0, 8.55)       | 0.82 (0, 8.55)       | 0.66 (0, 8.55)          | 0 (0, 7.12)          |
| Mushrooms/edible fungi*         | 2.05 (0, 8.36)          | 5.63 (0.68, 16.71)   | 9.37 (1.64, 25.64)   | 14.25 (3.29, 38.11)     | 28.49 (7.4, 74.79)   |
| Seaweeds*                       | 0 (0, 1.32)             | 0.27 (0, 2.83)       | 0.64 (0, 3.95)       | 1.26 (0, 6.41)          | 2.14 (0, 9.21)       |
| Fresh fruits*                   | 19.73 (3.95, 50)        | 42.74 (14.25, 100)   | 60 (21.37, 142.47)   | 100 (29.92, 199.45)     | 150 (56.99, 250)     |
| Dried fruits*                   | 0 (0, 0)                | 0 (0, 0.11)          | 0 (0, 0.41)          | 0 (0, 1.15)             | 0 (0, 3.29)          |
| Dairy products*                 | 0 (0, 0)                | 0 (0, 7.47)          | 0 (0, 28.49)         | 0 (0, 75.72)            | 38.85 (0, 200)       |
| Pork*                           | 28.49 (7.12, 71.23)     | 39.89 (13.15, 100)   | 34.19 (12.82, 85.48) | 28.49 (11.4, 64.11)     | 21.37 (7.12, 50)     |
| Beef, lamb, and other meats*    | 0 (0, 3.23)             | 0.55 (0, 4.79)       | 0.82 (0, 6.58)       | 1.64 (0, 9.32)          | 3.29 (0, 14.25)      |
| Poultry*                        | 1.48 (0, 6.58)          | 3.29 (0, 9.86)       | 3.29 (0, 9.86)       | 3.29 (0, 12.82)         | 3.29 (0, 13.15)      |
| Processed meats*                | 0 (0, 0)                | 0 (0, 0.16)          | 0 (0, 0.41)          | 0 (0, 0.82)             | 0 (0, 0.66)          |
| Organs*                         | 0 (0, 0.16)             | 0 (0, 0.55)          | 0 (0, 0.66)          | 0 (0, 0.66)             | 0 (0, 0.22)          |
| Aquatic products*               | 2.36 (0, 10.68)         | 6.58 (0.41, 19.73)   | 7.95 (0.82, 28.49)   | 9.86 (1.37, 31.34)      | 14.25 (2.74, 41.95)  |
| Fresh eggs*                     | 10.68 (2.3, 25.64)      | 15.67 (6.58, 34.19)  | 21.37 (7.84, 50)     | 25.64 (9.86, 50)        | 31.34 (14.25, 55)    |
| Processed eggs*                 | 0 (0, 0.16)             | 0 (0, 0.68)          | 0 (0, 1.1)           | 0 (0, 1.37)             | 0 (0, 1.32)          |
| Western staples*                | 0 (0, 0.68)             | 0 (0, 3.29)          | 0 (0, 5.26)          | 0 (0, 7.12)             | 0.21 (0, 12.82)      |
| Snacks*                         | 0 (0, 0.33)             | 0 (0, 1.1)           | 0 (0, 1.64)          | 0 (0, 2.1)              | 0 (0, 2.14)          |
| 100% vegetable and fruit juice* | 0 (0, 0)                | 0 (0, 0)             | 0 (0, 0)             | 0 (0, 0)                | 0 (0, 0)             |
| Coffee*                         | 0 (0, 0)                | 0 (0, 0)             | 0 (0, 0)             | 0 (0, 0)                | 0 (0, 0)             |
| Sweetened beverages*            | 0 (0, 3.42)             | 0 (0, 7.12)          | 0 (0, 8.22)          | 0 (0, 8.49)             | 0 (0, 4.93)          |
| Alcohol*                        | 0 (0, 3.82)             | 0 (0, 2.86)          | 0 (0, 2.19)          | 0 (0, 1.32)             | 0 (0, 0.66)          |

\* Indicates *p* value <0.001.

**Table S3.** Daily nutrient intakes of participants by quintiles of BBP-diet score

| Nutrient           | Quintile                   |                            |                            |                            |                            |
|--------------------|----------------------------|----------------------------|----------------------------|----------------------------|----------------------------|
|                    | Q1                         | Q2                         | Q3                         | Q4                         | Q5                         |
| Energy (Kcal)*     | 2270.86 (1692.71, 2989.74) | 2291.58 (1772.85, 2960.32) | 2218.68 (1727.32, 2851.82) | 2135.9 (1665.87, 2738.16)  | 1991.46 (1547.26, 2572.73) |
| Protein (g)*       | 52.82 (37.21, 74.31)       | 62.15 (45.94, 84.53)       | 65.61 (48.02, 88.05)       | 67.55 (50.06, 90.9)        | 70.46 (52.68, 94.13)       |
| Fat (g)*           | 83.72 (59.56, 113.24)      | 82.42 (60.09, 109.89)      | 79.8 (58.92, 107.29)       | 77.74 (57.53, 103.93)      | 71.46 (52.85, 95.63)       |
| Carbohydrate (g)*  | 279.13 (196.18, 402.28)    | 296.85 (219.55, 410.6)     | 293.09 (215.64, 401.92)    | 287.45 (209.9, 379.01)     | 268.28 (199.56, 355.74)    |
| Dietary fiber (g)* | 6.16 (4.28, 8.36)          | 8.91 (6.73, 11.77)         | 10.92 (8.19, 14.54)        | 13.36 (9.94, 17.86)        | 17.72 (12.89, 24.68)       |
| Vitamin A (µgRAE)* | 138.37 (87.23, 203.32)     | 222.35 (161.93, 303.75)    | 281.18 (206.07, 375.42)    | 341.89 (254.02, 449.01)    | 449.89 (335.33, 609.34)    |
| Thiamine (mg)*     | 0.91 (0.64, 1.3)           | 1.06 (0.78, 1.46)          | 1.1 (0.82, 1.49)           | 1.12 (0.84, 1.5)           | 1.16 (0.87, 1.53)          |
| Riboflavin (mg)*   | 0.48 (0.34, 0.67)          | 0.65 (0.49, 0.87)          | 0.76 (0.57, 1.01)          | 0.88 (0.66, 1.16)          | 1.12 (0.83, 1.52)          |
| Niacin (mg)*       | 10.76 (7.44, 15.52)        | 12.62 (9.12, 17.55)        | 12.96 (9.36, 17.78)        | 13.1 (9.58, 17.74)         | 13.46 (9.92, 18.31)        |
| Vitamin C (mg)*    | 34.29 (20.83, 50.91)       | 62.32 (43.74, 83.92)       | 80.6 (58.28, 106.78)       | 100.81 (71.98, 134.02)     | 137.91 (99.18, 193.67)     |
| Vitamin E (mg)*    | 26.54 (17.83, 38.58)       | 27.19 (19.23, 37.36)       | 28.6 (20.42, 38.55)        | 29.87 (21.58, 40.27)       | 30.99 (22.75, 41.78)       |
| Calcium (mg)*      | 216.12 (151.98, 297.55)    | 323.44 (244.76, 424.53)    | 401.81 (305.97, 529.4)     | 500.69 (377.03, 655.21)    | 680.91 (505, 921.93)       |
| Potassium (mg)*    | 1212.91 (875.15, 1653.86)  | 1635.62 (1255.44, 2154.94) | 1906.41 (1461.62, 2504.08) | 2218.51 (1703.36, 2913.02) | 2865.35 (2143.53, 3811.11) |
| Sodium (mg)*       | 3792.42 (2685.74, 5494.97) | 3573.24 (2577.34, 4968.85) | 3471.28 (2550.44, 4806.29) | 3397.66 (2526.66, 4668.47) | 3242.09 (2394.57, 4391.57) |
| Magnesium (mg)*    | 228.89 (165.3, 311.44)     | 283.82 (215.42, 374.59)    | 315.51 (238.74, 417.29)    | 348.8 (263.83, 464.16)     | 400.89 (302.99, 534.97)    |
| Iron (mg)*         | 11.84 (8.65, 15.74)        | 15.07 (11.62, 19.67)       | 17.24 (13.22, 22.6)        | 19.7 (15.06, 25.83)        | 24.51 (18.15, 33.07)       |
| Zinc (mg)*         | 7.57 (5.31, 10.62)         | 8.84 (6.55, 12.04)         | 9.25 (6.84, 12.36)         | 9.66 (7.21, 12.75)         | 10.39 (7.83, 14)           |
| Selenium (µg)*     | 28.1 (19.32, 40.61)        | 34.44 (24.62, 47.89)       | 37.44 (26.52, 52.03)       | 39.57 (28.12, 54.44)       | 42.09 (30.1, 57.9)         |

\* Indicates *p* value <0.001

**Table S4.** Subgroup analysis of associations between BBP-diet score and risk of hypertension

| Subgroup          | N (%)           | Quintile (OR, 95% CI)*, † |                      |                      |                      |                      | <i>p</i> for interaction |
|-------------------|-----------------|---------------------------|----------------------|----------------------|----------------------|----------------------|--------------------------|
|                   |                 | Q1                        | Q2                   | Q3                   | Q4                   | Q5                   |                          |
| Gender            |                 |                           |                      |                      |                      |                      | 0.7001                   |
| Male              | 28,388 (45.97%) | reference                 | 0.935 (0.865, 1.01)  | 0.913 (0.843, 0.989) | 0.83 (0.763, 0.902)  | 0.819 (0.747, 0.898) |                          |
| Female            | 33,359 (54.03%) | reference                 | 1.008 (0.925, 1.098) | 0.964 (0.884, 1.05)  | 0.961 (0.882, 1.047) | 0.906 (0.831, 0.989) |                          |
| Age               |                 |                           |                      |                      |                      |                      | 0.1254                   |
| 18~ < 30          | 5503 (8.91%)    | reference                 | 1.473 (1.047, 2.072) | 0.912 (0.635, 1.308) | 1.066 (0.743, 1.529) | 1.132 (0.769, 1.666) |                          |
| 30~ < 45          | 13,537 (21.92%) | reference                 | 0.976 (0.843, 1.131) | 0.894 (0.77, 1.037)  | 0.877 (0.753, 1.021) | 0.901 (0.768, 1.058) |                          |
| 45~ < 60          | 23,176 (37.53%) | reference                 | 0.957 (0.878, 1.044) | 0.95 (0.87, 1.037)   | 0.891 (0.815, 0.974) | 0.881 (0.8, 0.969)   |                          |
| ≥ 60              | 19,531 (31.63%) | reference                 | 0.939 (0.854, 1.032) | 0.954 (0.866, 1.05)  | 0.893 (0.809, 0.986) | 0.784 (0.709, 0.867) |                          |
| Physical activity |                 |                           |                      |                      |                      |                      | 0.5472                   |
| Low               | 14,590 (23.63%) | reference                 | 0.999 (0.891, 1.119) | 0.971 (0.864, 1.091) | 0.954 (0.846, 1.076) | 0.834 (0.733, 0.949) |                          |
| Medium            | 15,320 (24.81%) | reference                 | 0.946 (0.832, 1.076) | 0.955 (0.842, 1.083) | 0.842 (0.741, 0.956) | 0.795 (0.699, 0.904) |                          |
| High              | 31,837 (51.56%) | reference                 | 0.958 (0.885, 1.036) | 0.908 (0.838, 0.983) | 0.873 (0.804, 0.948) | 0.861 (0.79, 0.94)   |                          |
| Current smoker    |                 |                           |                      |                      |                      |                      | 0.1202                   |
| No                | 45,746 (74.09%) | reference                 | 0.996 (0.928, 1.069) | 0.951 (0.886, 1.021) | 0.923 (0.859, 0.991) | 0.852 (0.792, 0.917) |                          |
| Yes               | 16,001 (25.91%) | reference                 | 0.915 (0.828, 1.011) | 0.903 (0.814, 1.003) | 0.798 (0.714, 0.891) | 0.863 (0.762, 0.978) |                          |
| Diabetes          |                 |                           |                      |                      |                      |                      | <0.0001                  |
| No                | 56,478 (91.47%) | reference                 | 0.978 (0.92, 1.038)  | 0.9 (0.894, 1.01)    | 0.905 (0.85, 0.963)  | 0.858 (0.803, 0.917) |                          |
| Yes               | 5269 (8.53%)    | reference                 | 0.844 (0.685, 1.04)  | 0.747 (0.609, 0.916) | 0.696 (0.566, 0.856) | 0.654 (0.532, 0.804) |                          |
| Hyperlipidemic    |                 |                           |                      |                      |                      |                      | 0.5423                   |
| No                | 38,221 (61.9%)  | reference                 | 0.975 (0.906, 1.05)  | 0.95 (0.881, 1.024)  | 0.889 (0.823, 0.96)  | 0.827 (0.762, 0.897) |                          |
| Yes               | 23,526 (38.1%)  | reference                 | 0.962 (0.876, 1.055) | 0.918 (0.836, 1.007) | 0.882 (0.802, 0.968) | 0.859 (0.779, 0.947) |                          |

\* Abbreviations: OR, odds ratio; CI, confidence interval.

† OR for risk of hypertension is shown by comparing the highest quintile (Q5) with the lowest quintile (Q1) with the full-adjusted logistic model but without the variable used for dividing the subgroups.

**Table S5.** Sensitivity analysis for further adjustment or exclusion

| Dietary<br>pattern | Sensitive analysis                                     | Quintile  |                      |                      |                      |                      |
|--------------------|--------------------------------------------------------|-----------|----------------------|----------------------|----------------------|----------------------|
|                    |                                                        | Q1        | Q2                   | Q3                   | Q4                   | Q5                   |
| BBP-diet           | Main model*                                            | reference | 0.968 (0.913, 1.025) | 0.935 (0.882, 0.992) | 0.885 (0.834, 0.939) | 0.842 (0.791, 0.896) |
|                    | Further adjusted for DM and hyperlipidemic             | reference | 0.969 (0.915, 1.027) | 0.934 (0.881, 0.991) | 0.885 (0.834, 0.94)  | 0.835 (0.785, 0.889) |
|                    | Excluded participants who didn't give household income | reference | 0.963 (0.904, 1.027) | 0.937 (0.879, 0.999) | 0.894 (0.838, 0.955) | 0.853 (0.797, 0.913) |
|                    | Excluded participants who were prediagnosed with HTN   | reference | 0.981 (0.921, 1.044) | 0.941 (0.883, 1.003) | 0.868 (0.813, 0.927) | 0.824 (0.769, 0.884) |
|                    | Main model*                                            | reference | 1.006 (0.949, 1.067) | 0.964 (0.909, 1.022) | 1.005 (0.949, 1.07)  | 0.912 (0.854, 0.973) |
|                    | Further adjusted for DM and hyperlipidemic             | reference | 1.003 (0.913, 1.063) | 0.964 (0.909, 1.022) | 1.004 (0.943, 1.069) | 0.906 (0.846, 0.964) |
| DASH diet          | Excluded participants who didn't give household income | reference | 1.007 (0.944, 1.074) | 0.956 (0.897, 1.02)  | 1.014 (0.948, 1.086) | 0.92 (0.857, 0.987)  |
|                    | Excluded participants who were prediagnosed with HTN   | reference | 1.008 (0.946, 1.074) | 0.945 (0.887, 1.007) | 1.001 (0.935, 1.072) | 0.88 (0.819, 0.946)  |

\* Adjusted for age, gender, BMI, living area, education level, income, marital status, physical activity, sedentary behavior, sleep duration, current smoker (Yes/No), excessive drinking (Yes/No), second-hand smoke (Yes/No), medical examination within one year (Yes/No), family history of HTN (Yes/No), daily energy intake (Kcal/d), and daily sodium intake (mg/d).
